# Supplementary material
Source: PubMed Central journal article supplement (PMC11023920)
Supplement: mmc1.pdf [file mmc1.pdf]

**The American Journal of Human Genetics, Volume 111**

**Supplemental information**

**Many roads to a gene-environment interaction**

**Kenneth E. Westerman and Tamar Sofer**

**Supplemental Table S1: Phenomenon-specific statistical approaches.**

| Phenomenon                                               | Assessment strategy                                                                                                                   | Relevant statistical model and/or software tools                                                                                                                                                                                                            |
|----------------------------------------------------------|---------------------------------------------------------------------------------------------------------------------------------------|-------------------------------------------------------------------------------------------------------------------------------------------------------------------------------------------------------------------------------------------------------------|
| <b>Phenomenon 1 (functional)</b>                         | Perform standard product term regression-based test; rule out other phenomena using associated statistical tests and domain knowledge | <ul style="list-style-type: none"> <li>• Some standard GWAS software programs (e.g., PLINK<sup>1</sup>)</li> <li>• Interaction-specific GWAS programs (e.g., GEM<sup>2</sup>)</li> <li>• Regression using standard statistical analysis programs</li> </ul> |
| <b>Phenomenon 2 (nonlinear mediator)</b>                 | Test for nonlinearity of the M-Y relationship (if M is known and measured)                                                            | <ul style="list-style-type: none"> <li>• If known and measured, test for nonlinearity of the mediator (e.g., using likelihood ratio test of spline vs. simple linear model<sup>3</sup>)</li> </ul>                                                          |
|                                                          | Test for nonlinearity of the E-Y relationship                                                                                         | <ul style="list-style-type: none"> <li>• E.g., likelihood ratio test comparing nested linear and non-linear models</li> </ul>                                                                                                                               |
| <b>Phenomenon 3 (G-E correlation plus nonlinearity)</b>  | Test for nonlinearity of the E-Y relationship                                                                                         | <ul style="list-style-type: none"> <li>• E.g., likelihood ratio test comparing nested linear and non-linear models</li> </ul>                                                                                                                               |
| <b>Phenomenon 4 (Heterogeneous variability)</b>          | Test for dispersion versus artifactual vQTL from mean-variance relationship                                                           | <ul style="list-style-type: none"> <li>• Dispersion test from Young et al.<sup>4</sup></li> </ul>                                                                                                                                                           |
|                                                          | Test for specific GxE versus general dispersion                                                                                       | <ul style="list-style-type: none"> <li>• Scaling model test from Domingue et al.<sup>5</sup></li> </ul>                                                                                                                                                     |
| <b>Phenomenon 5 (Heterogeneous exposure measurement)</b> | Domain knowledge                                                                                                                      | <ul style="list-style-type: none"> <li>• Difficult to test statistically</li> </ul>                                                                                                                                                                         |

**Supplemental Note: Simulation setup.**

1. Simulate G (N = 10,000) with MAF = 0.25:  $G \sim \text{binomial}(2, 0.25)$
2. Simulate E, M (where applicable), and Y as follows:

| Phenomenon                                             | Exposure (E)                                     | Mediator (M)    | Outcome (Y)                                        |
|--------------------------------------------------------|--------------------------------------------------|-----------------|----------------------------------------------------|
| <b>Phenomenon 1: Functional</b>                        | $N(5, 1)$                                        |                 | $N(E + G * E, 1)$                                  |
| <b>Phenomenon 2: Nonlinear mediator</b>                | $N(0, 1)$                                        | $N(G + E, 0.1)$ | $N(\sqrt[3]{M + 4}, 0.1)$                          |
| <b>Phenomenon 3: G-E correlation with nonlinearity</b> | $N(G, 1)$                                        |                 | $N(\sqrt[3]{E + 4}, 0.1)$                          |
| <b>Phenomenon 4: Heterogeneous variability</b>         | $N(5, 1)$                                        |                 | $Y^* \sim N(E_{std}, 1)$<br>$Y \sim N(G * Y^*, 1)$ |
| <b>Phenomenon 5: Heterogeneous measurement</b>         | $E \sim N(5, 1)$<br>$E_m \sim N(E, e^{0.5 * G})$ |                 | $Y \sim N(E, 1)$                                   |

$E_{std}$  denotes a standardized (mean zero and unit variance) version of  $E$ .  $E_m$  denotes the measured exposure, which is then used for the interaction test.

3. Test for statistical interaction using the following regression model:  $Y \sim G + E + G * E$

Regression results for these scenarios are presented in the following table:

| Phenomenon                                             | Regression term | Effect estimate | P-value |
|--------------------------------------------------------|-----------------|-----------------|---------|
| <b>Phenomenon 1: Functional</b>                        | G               | 0.103           | 0.224   |
|                                                        | E               | 1.021           | <0.001  |
|                                                        | G:E             | 0.98            | <0.001  |
| <b>Phenomenon 2: Nonlinear mediator</b>                | G               | 0.12            | <0.001  |
|                                                        | E               | 0.137           | <0.001  |
|                                                        | G:E             | -0.017          | <0.001  |
| <b>Phenomenon 3: G-E correlation with nonlinearity</b> | G               | 0.008           | 0.001   |
|                                                        | E               | 0.136           | <0.001  |
|                                                        | G:E             | -0.014          | <0.001  |
| <b>Phenomenon 4: Heterogeneous variability</b>         | G               | -4.934          | <0.001  |
|                                                        | E               | 0.004           | 0.822   |
|                                                        | G:E             | 0.981           | <0.001  |
| <b>Phenomenon 5: Heterogeneous measurement</b>         | G               | 1               | <0.001  |
|                                                        | E measured      | 0.485           | <0.001  |
|                                                        | G:E measured    | -0.197          | <0.001  |

## References

1. Chang, C.C., Chow, C.C., Tellier, L.C.A.M., Vattikuti, S., Purcell, S.M., and Lee, J.J. (2015). Second-generation PLINK: rising to the challenge of larger and richer datasets. *Gigascience* 4, 7. 10.1186/s13742-015-0047-8.
2. Westerman, K.E., Pham, D.T., Hong, L., Chen, Y., Sevilla-González, M., Sung, Y.J., Sun, Y. V, Morrison, A.C., Chen, H., and Manning, A.K. (2021). GEM: scalable and flexible gene–environment interaction analysis in millions of samples. *Bioinformatics*. 10.1093/bioinformatics/btab223.
3. Harrell, F.E. (2015). General Aspects of Fitting Regression Models. In 10.1007/978-3-319-19425-7\_2.
4. Young, A.I., Wauthier, F.L., and Donnelly, P. (2018). Identifying loci affecting trait variability and detecting interactions in genome-wide association studies. *Nat Genet* 50, 1608–1614. 10.1038/s41588-018-0225-6.
5. Domingue, B.W., Kanopka, K., Mallard, T.T., Trejo, S., and Tucker-Drob, E.M. (2022). Modeling Interaction and Dispersion Effects in the Analysis of Gene-by-Environment Interaction. *Behav Genet* 52. 10.1007/s10519-021-10090-8.
